# Supplementary material for: Genetic Variants in Immune Related Genes as Predictors of Responsiveness to BCG Immunotherapy in Metastatic Melanoma Patients
Source: PubMed Central journal article supplement (PMC7795941; doi:10.3390/cancers13010091), 2020-12-30
Supplement: cancers-13-00091-s001.pdf [file cancers-13-00091-s001.pdf]

**Figure S1**

**A**

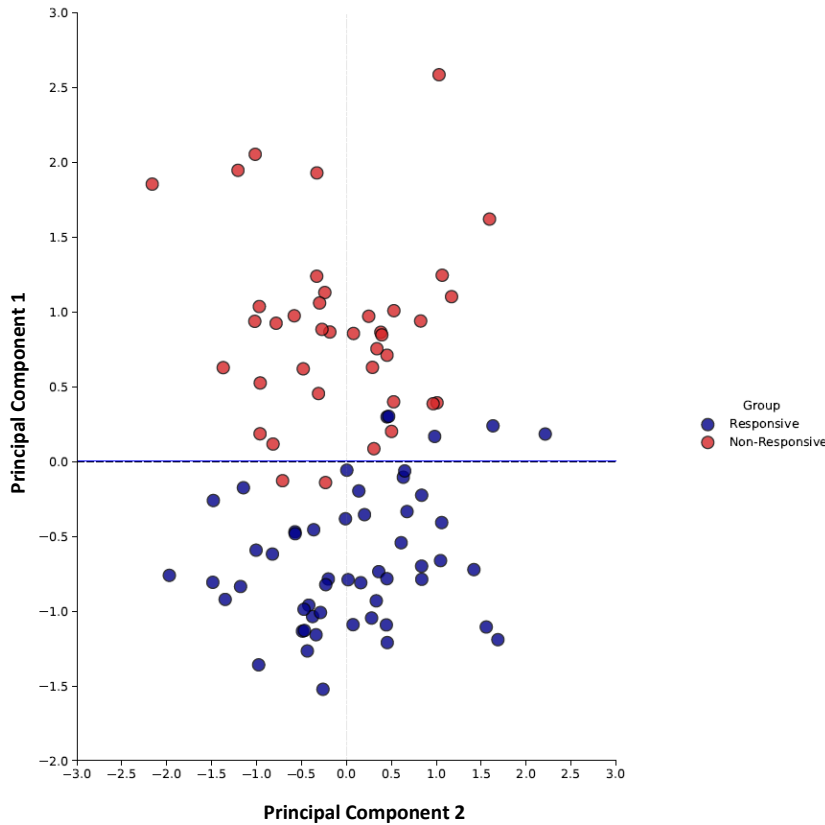

**B**

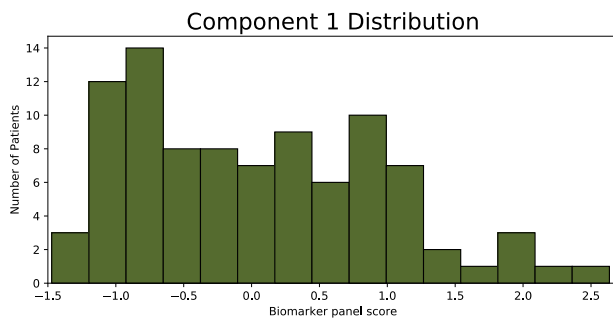

**C**

| SNP             | Principal Component 1 |
|-----------------|-----------------------|
| rs1135791-C     | 0.061898905           |
| rs1143627-T     | -0.572914865          |
| rs1143634-C     | 0.223968507           |
| rs1343151-C     | 0.181084147           |
| rs16944-C       | -0.572914865          |
| rs17215556-C    | -0.001129828          |
| rs17235409-G    | -0.035938289          |
| rs17235416-TGTG | -0.035938289          |
| rs17860508-GC   | -0.01106161           |
| rs1799987-A     | 0.378582413           |
| rs1800629-G     | 0.065297729           |
| rs1800896-A     | 0.036832864           |
| rs1801157-G     | 0.068161602           |
| rs2076530-A     | 0.026778846           |
| rs2569190-G     | 0.189771597           |
| rs2569193-A     | -0.017513235          |
| rs34448891-GT   | 1.05879E-22           |
| rs361525-G      | -0.038789993          |
| rs3731865-C     | 0.102320583           |
| rs3948464-C     | -0.020225295          |
| rs4073-A        | 0.197724616           |
| rs4696480-T     | 0.044585597           |
| rs4804803-A     | 0.039180265           |
| rs5743708-G     | 0.037086666           |
| 3UTR122GA-A     | 0.082013453           |
| 3UTR370GT-G     | -0.01773406           |

**Figure S1. Additional principle component analysis (PCA) of immune gene SNP panel in the pilot patient cohort (MMAIT stage IV BCG-treated).** (A) The immune gene panel consisting of the 26 common and relevant SNPs with their respective scores for each patient are represented as data points on the PCA plot. The first and second principal components represent the most variation among the SNP scores. Non-responders show lower values for the first principal component. The first component therefore separates responders from non-responders based on their SNP scores. Grey line = cut off point at 0.005. Responders:  $Comp2 \leq 0.005$ ; Non-responders:  $Comp2 > 0.005$ . (B) Histogram showing the distribution of principal component 1 among all patients. (C) Co-efficient for each SNP in principal component 1 calculated by the PCA.

**Table S1A.** Clinicopathologic characteristics of study patients: Pilot cohort of MMAIT stage IV BCG+Placebo-treated patients (n=92)

| <b>Clinicopathologic Variable</b>     | <b>Number of Patients (%)</b> |
|---------------------------------------|-------------------------------|
| Age (Years)*                          | 55.4 ± 11.8                   |
| Gender                                |                               |
| Male                                  | 54 (59%)                      |
| Female                                | 38 (41%)                      |
| Lymph Node Positive                   |                               |
| 0                                     | 3 (3%)                        |
| 1                                     | 13 (14%)                      |
| 2-3                                   | 6 (7%)                        |
| ≥4                                    | 31 (34%)                      |
| Unknown                               | 39 (42%)                      |
| Breslow                               |                               |
| ≤1.00mm                               | 20 (22%)                      |
| 1.01-2.00mm                           | 22 (24%)                      |
| 2.01-4.00mm                           | 13 (14%)                      |
| >4.00mm                               | 11 (12%)                      |
| Unknown                               | 26 (28%)                      |
| Primary Site                          |                               |
| Extremity                             | 32 (35%)                      |
| Head/Neck                             | 18 (20%)                      |
| Trunk                                 | 21 (23%)                      |
| Mucosal                               | 1 (1%)                        |
| Unknown                               | 20 (22%)                      |
| M-Stage                               |                               |
| M1a                                   | 27 (29%)                      |
| M1b                                   | 20 (22%)                      |
| M1c                                   | 45 (49%)                      |
| Baseline LDH                          |                               |
| Normal                                | 40 (43%)                      |
| Elevated                              | 52 (57%)                      |
| Number of Metastasis                  |                               |
| 1                                     | 48 (52%)                      |
| 2-3                                   | 41 (45%)                      |
| 4-5                                   | 3 (3%)                        |
| ECOG Performance Status               |                               |
| 0                                     | 77 (84%)                      |
| 1                                     | 14 (15%)                      |
| Unknown                               | 1 (1%)                        |
| Prior Diagnosis of Stage III Melanoma |                               |
| Yes                                   | 52 (57%)                      |
| No                                    | 40 (43%)                      |
| Previous Treatment for Melanoma       |                               |
| Yes                                   | 41 (45%)                      |
| No                                    | 51 (55%)                      |

\* Average ± 1 Standard Deviation

**Table S1B.** Clinicopathologic characteristics of study patients: Verification cohort of MMAIT stage III BCG-treated patients (n=269)

| <b>Clinicopathologic Variable</b> | <b>Number of Patients (%)</b> |
|-----------------------------------|-------------------------------|
| Age (Years)*                      | 52.7 ± 13.8                   |
| Gender                            |                               |
| Male                              | 165 (61%)                     |
| Female                            | 104 (39%)                     |
| Lymph Node Positive               |                               |
| 1                                 | 151 (56%)                     |
| 2-3                               | 82 (30%)                      |
| ≥4                                | 36 (13%)                      |
| Breslow                           |                               |
| ≤1.00mm                           | 43 (16%)                      |
| 1.01-2.00mm                       | 67 (25%)                      |
| 2.01-4.00mm                       | 63 (23%)                      |
| >4.00mm                           | 47 (17%)                      |
| Unknown                           | 49 (18%)                      |
| Primary Site                      |                               |
| Extremity                         | 103 (38%)                     |
| Head/Neck                         | 32 (12%)                      |
| Trunk                             | 97 (36%)                      |
| Mucosal                           | 2 (1%)                        |
| Unknown                           | 35 (13%)                      |
| Ulceration                        |                               |
| Yes                               | 74 (28%)                      |
| No                                | 90 (33%)                      |
| Unknown                           | 104 (39%)                     |
| Palpable Lymph Node               |                               |
| Yes                               | 123 (46%)                     |
| No                                | 146 (54%)                     |

\* Average ± 1 Standard Deviation

**Table S1C.** Clinicopathologic characteristics of study patients: Control cohort of MSLT-1 stage III non-BCG and non-immunotherapy treated patients (n=80)

| <b>Clinicopathologic Variable</b> | <b>Number of Patients (%)</b> |
|-----------------------------------|-------------------------------|
| Age (Years)*                      | 50.4 ± 13.8                   |
| Gender                            |                               |
| Male                              | 49 (61%)                      |
| Female                            | 31 (39%)                      |
| Lymph Node Positive               |                               |
| 1                                 | 67 (84%)                      |
| 2-3                               | 12 (15%)                      |
| ≥4                                | 1 (1%)                        |
| Breslow                           |                               |
| ≤1.00mm                           | 5 (6%)                        |
| 1.01-2.00mm                       | 22 (28%)                      |
| 2.01-4.00mm                       | 40 (50%)                      |
| >4.00mm                           | 13 (16%)                      |
| Primary Site                      |                               |
| Extremity                         | 31 (39%)                      |
| Head/Neck                         | 16 (20%)                      |
| Trunk                             | 33 (41%)                      |
| Ulceration                        |                               |
| Yes                               | 33 (41%)                      |
| No                                | 47 (59%)                      |

\* Average ± 1 Standard Deviation
